# Supplementary material
Source: PubMed Central journal article supplement (PMC8292356)
Supplement: 41421_2021_293_MOESM1_ESM.pdf [file 41421_2021_293_MOESM1_ESM.pdf]

1

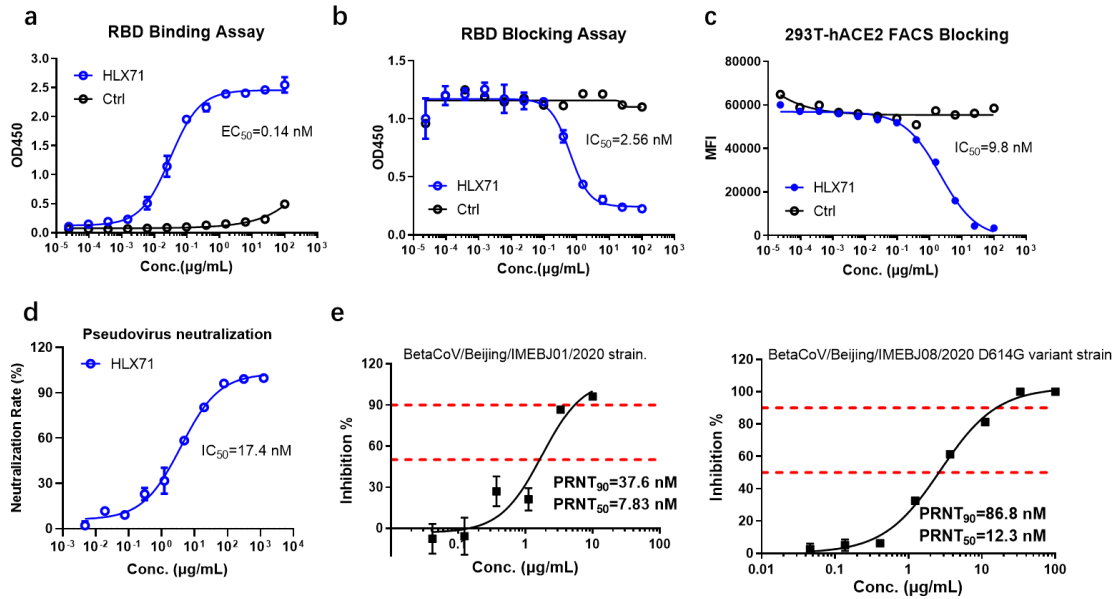

2  
3  
4  
5  
6  
7  
8  
9  
10  
11  
12  
13  
14  
15  
16  
17  
18

**Supplementary Fig. 1**, SARS-CoV-2 neutralization activity of HLX71. **a)** RBD binding assay. 96-well plates were coated with 2 µg/ml RBD protein, and then serial diluted HLX71 was added to the plates. The binding of HLX71 to RBD was detected by ELISA. **b)** Blocking of RBD-ACE2 binding by HLX71. 96-well plates were coated with 2 µg/ml RBD, incubated with 50 ng/ml ACE2-his for 1h, and then treated with serial diluted HLX71 for another 1h. The ability for HLX71 to block the SARS-CoV-2 RBD from binding to the recombinant ACE2 was measured by ELISA. **c)** HLX71 blocking of RBD binding to HEK293T cells transiently expressing hACE2. hACE2-293T cell suspension was incubated with 0.1 µg/ml RBD-Fc plus serial diluted HLX71 for 1h. RBD bound to hACE2-293T cells were detected by PE labelled anti-Fc antibody. **d)** The neutralization profile of HLX71 for SARS-CoV-2 pseudovirus. Pseudovirus were pre-incubated with serial diluted HLX71 for 1 h at 37 °C and then incubated with 293T-hACE2 cells for 24 h. The luminescence intensity was detected for the IC<sub>50</sub> calculation. **e)** The neutralization profile of HLX71 for SARS-CoV-2 BetaCoV/Beijing/IMEBJ01/2020 or BetaCoV/Beijing/IMEBJ08/2020 strain (D614G). Then Plaque Reduction Neutralization Test (PRNT) was used to evaluate neutralization activity of HLX71 for live virus.

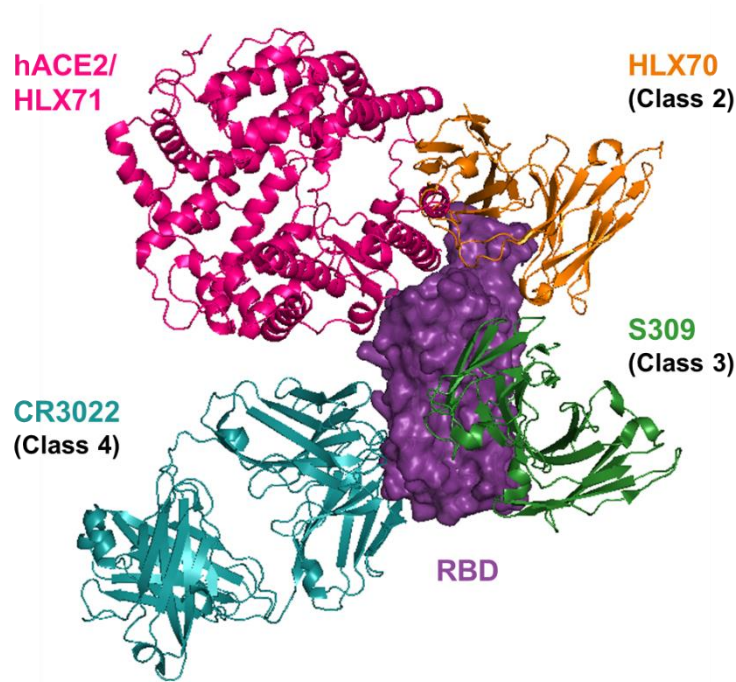

20 **Supplementary Fig. 2**, Structural analysis of HLX71 binding to RBD. The structures of the SARS-CoV-  
21 2 RBD in complex with CR3022 (PDB: 6W41) and the Spike protein in complex with S309 (PDB:  
22 6WPS) are aligned and superimposed onto the structure of the RBD bound with hACE2/ HLX71 (PDB:  
23 7A91). The structure of RBD with HLX70 (PDB: 7CWM) is also aligned for comparison. The  
24 classifications are based on the structural analyses of Barnes et al. HLX71 has a unique binding epitope  
25 on RBD distinct from the one bound by HLX70. Both epitopes are non-overlapping with class 3 (S309)  
26 and class 4 (CR3022) Nabs, and therefore could potentially function in a combinational pair. The  
27 structural alignments and figure were prepared using Pymol (Schrödinger, LLC).

28  
29

30  
31  
32

**Supplementary Table S1**, Neutralization potency of HLX70, HLX71 and HLX70+HLX71 combination against pseudoparticles encoding individual escape mutants-IC<sub>50</sub> summary.

| <b>Mutants</b>   | <b>HLX70<br/>IC<sub>50</sub> (µg/mL)</b> | <b>HLX71<br/>IC<sub>50</sub> (µg/mL)</b> | <b>HLX70+HLX71*<br/>IC<sub>50</sub> (µg/mL)</b> | <b>CI</b> |
|------------------|------------------------------------------|------------------------------------------|-------------------------------------------------|-----------|
| <b>Wild Type</b> | 0.1171                                   | 3.03                                     | 0.305                                           | 0.517     |
| <b>K417E</b>     | 0.07108                                  | 7.722                                    | 0.204                                           | 0.500     |
| <b>K444Q</b>     | 0.1126                                   | 3.511                                    | 0.398                                           | 0.684     |
| <b>V445A</b>     | 0.1722                                   | 7.554                                    | 0.991                                           | 1.068     |
| <b>N450D</b>     | 0.09426                                  | 6.781                                    | 0.492                                           | 0.930     |
| <b>Y453F</b>     | 0.2096                                   | 1.502                                    | 0.704                                           | 0.950     |
| <b>L455F</b>     | 0.1691                                   | 10.61                                    | 0.965                                           | 1.027     |
| <b>E484K</b>     | N/A                                      | 8.207                                    | 9.678                                           | 0.983     |
| <b>G485D</b>     | N/A                                      | 39.83                                    | 59.586                                          | 1.247     |
| <b>F486V</b>     | 1.031                                    | 16.08                                    | 3.221                                           | 0.688     |
| <b>F490P</b>     | N/A                                      | 9.691                                    | 29.688                                          | 2.553     |
| <b>Q493K</b>     | 0.5058                                   | 6.405                                    | 1.890                                           | 0.869     |
| <b>D614G</b>     | 0.3599                                   | 3.484                                    | 1.126                                           | 0.791     |
| <b>G339D</b>     | 0.1927                                   | 7.722                                    | 2.776                                           | 2.700     |
| <b>V367F</b>     | 0.08376                                  | 0.6841                                   | 0.619                                           | 1.984     |
| <b>P384S</b>     | 0.0718                                   | 3.196                                    | 0.422                                           | 1.091     |
| <b>R408I</b>     | 0.1074                                   | 0.1683                                   | 1.152                                           | 7.492     |
| <b>A435S</b>     | 0.04571                                  | 10.04                                    | 0.637                                           | 2.374     |
| <b>S494P</b>     | 0.08575                                  | 3.802                                    | 0.8802                                          | 1.903     |
| <b>N439K</b>     | 0.3153                                   | 3.598                                    | 0.8274                                          | 0.629     |
| <b>G446V</b>     | 0.05772                                  | 17.76                                    | 0.743                                           | 2.181     |
| <b>K458N</b>     | 0.1712                                   | 1.33                                     | 0.827                                           | 1.324     |
| <b>S477I</b>     | 0.1604                                   | 6.191                                    | 0.660                                           | 0.775     |
| <b>S477N</b>     | 0.2723                                   | 3.395                                    | 0.503                                           | 0.431     |
| <b>F490L</b>     | N/A                                      | 1.758                                    | 11.556                                          | 5.478     |
| <b>L518I</b>     | 0.1956                                   | 8.075                                    | 0.636                                           | 0.608     |
| <b>H519P</b>     | 0.1931                                   | 7.9                                      | 1.413                                           | 1.369     |
| <b>T323I</b>     | 0.05941                                  | 16                                       | 1.067                                           | 3.048     |
| <b>P330S</b>     | 0.2147                                   | 3.052                                    | 1.053                                           | 1.105     |
| <b>A344S</b>     | 0.1991                                   | 4.061                                    | 0.539                                           | 0.562     |
| <b>P384L</b>     | 0.1765                                   | 5.169                                    | 1.148                                           | 1.269     |
| <b>Q414A</b>     | 0.1762                                   | 2.036                                    | 0.890                                           | 1.207     |
| <b>Q414E</b>     | 0.07974                                  | 2.889                                    | 0.207                                           | 0.493     |
| <b>V483A</b>     | N/A                                      | 7.8                                      | 4.3638                                          | 0.466     |
| <b>V341I</b>     | 0.1572                                   | 4.548                                    | 0.730                                           | 0.907     |
| <b>K458R</b>     | 0.3519                                   | 5.924                                    | 1.145                                           | 0.703     |
| <b>G476S</b>     | 0.3883                                   | 5.028                                    | 1.088                                           | 0.648     |
| <b>L452R</b>     | 0.7743                                   | 2.535                                    | 1.516                                           | 0.824     |
| <b>A475V</b>     | 0.5921                                   | 7.436                                    | 2.407                                           | 0.947     |
| <b>N501Y</b>     | 0.1987                                   | 0.6267                                   | 0.9426                                          | 2.044     |
| <b>P.1</b>       | N/A                                      | 0.49                                     | 0.4716                                          | 0.80      |
| <b>B.1.1.7</b>   | 0.056                                    | 0.66                                     | 0.31422                                         | 1.33      |
| <b>B.1.429</b>   | 0.14                                     | 1.01                                     | 0.633                                           | 1.29      |
| <b>B.1.526-1</b> | N/A                                      | 1.4                                      | 4.2372                                          | 2.52      |

|                   |     |      |        |      |
|-------------------|-----|------|--------|------|
| <b>B.1.617</b>    | N/A | 0.57 | 2.2668 | 3.31 |
| <b>N501Y.V2-1</b> | N/A | 1.09 | 1.1958 | 0.91 |

33  
34

\* The combination of HLX70 and HLX71 is mixed with 1:5 w/w ratio.

35 **Materials.** hACE2-IRES-luc transgenic mice were purchased from Shanghai Model Organisms Center,  
36 Inc. HLX70 and HLX71 are produced by Shanghai Henlius Biotech, Inc. according to Good  
37 Manufacturing Practice guidelines. RBD of SARS-CoV-2 (DRA42) was purchased from Novoprotein.  
38 The MASCp6, SARS-CoV-2 BetaCoV/Beijing/IMEBJ01/2020 and BetaCoV/Beijing/IMEBJ08/2020  
39 (D614G) strain were provided by State Key Laboratory of Pathogen and Biosecurity, Beijing Institute  
40 of Microbiology and Epidemiology. All the pseudovirus mutants were provided by Vazyme Biotech Co.,  
41 Ltd. PE conjugated anti-his (IC050P) was purchased from R&D System, PE conjugated anti-Fc (12-  
42 4998-82) was purchased from eBioscience.

#### 43 **Methods**

44 ***in vivo* efficacy study.** The *in vivo* protection efficacy of HLX71 was assessed by using humanized  
45 hACE2-IRES-luc transgenic mouse model (Shanghai Model Organisms Center, Inc.). 6-8 weeks old  
46 female hACE2-IRES-luc transgenic mice were randomly divided into 3 groups and infected intranasally  
47 with a lethal dose of SARS-CoV-2 virus (nCoV-SH01, GenBank: MT121215.1). A single dose of HLX71  
48 (15 or 50 mg/kg) or PBS control were injected intraperitoneally 2 hours after SARS-CoV-2 challenge.  
49 The mortality of the mice was recorded every day for 5 days.

50 For the HLX70+HLX71 *in vivo* combination study, BALB/c mice were treated with HLX70 (5  
51 mg/kg), HLX71 (25 mg/kg) or HLX70+HLX71 (5+25 mg/kg) 2 h after  $1.6 \times 10^4$  PFU of MASCp6  
52 (mouse-adapted strain at passage 6 of SARS-CoV-2, with N501Y mutation) infection. 5 days after  
53 virus challenge mice were sacrificed to analyze the virus burden in both lung and trachea. Virus  
54 titers are demonstrated as RNA copies per gram tissue. \*  $p < 0.05$ .

55 **BLI.** Biolayer interferometry (BLI) technology was applied to study the binding affinity of  
56 HLX70/HLX71 to RBD. The Pro A sensor can specifically bind the Fc fragment of HLX70/HLX71, and  
57 HLX70/HLX71 captured on the surface of the sensor can specifically bind to RBD in solution at different  
58 concentrations (the highest used concentration is 3  $\mu\text{g/mL}$ , followed by 4 times of double dilution, total  
59 5 concentrations of RBD antigen) with association and dissociation reactions. The Octet monitors the  
60 interaction between two molecules in real time by BLI technology. Data are converted from the  
61 association and dissociation reaction between two molecules into a binding dissociation curve and are  
62 calculated as the corresponding binding constant ( $K_a$ ), dissociation constant ( $K_d$ ) and affinity constant or  
63 dissociation equilibrium constant ( $K_D$ ) through software analysis.

64 **HLX70+HLX71 combo blocking activity assay.** 0.5  $\mu\text{g/mL}$  HLX71 were mixed with serial diluted  
65 HLX70 and incubated with RBD-his for 20 min, then added into 293T-hACE2 cell suspension for 30  
66 min incubation and PE labelled anti-his antibody was used for detection. Similarly, 0.05  $\mu\text{g/mL}$  HLX70  
67 were mixed with serial diluted HLX71 and incubated with RBD-his, then added into 293T-hACE2 cell  
68 suspension and PE labelled anti-his antibody was used for detection. All of those assays were conducted  
69 in 3 replicates.

70 **HLX70+HLX71 combo SARS-CoV-2 neutralization activity.** HLX70 was mixed with HLX71  
71 according to the ratio of 1:2, 1:3, 1:5, 1:10 and 1:30. The mixtures were 3-fold serial diluted and added  
72 to approximately 500 PFU of SARS-CoV-2 virus solution for 1h incubation at 37 °C. Then, the mixture  
73 was added to Vero cell monolayers in a 12-well cell culture plates which were incubated in a 37 °C, 5%  
74 CO<sub>2</sub> incubator for 1 h. After subsequent incubation, the cells were stained with crystal violet dissolved  
75 in formaldehyde to visualize the plaques. The numbers of plaques in different wells were counted and  
76 the percentage of plaque reduction was calculated as the following formula: Percent of plaque reduction  
77 (%) =  $100\% - (\text{plaque number with test drugs}) / (\text{plaque number without test drugs}) \times 100\%$ . The PRNT<sub>90</sub>  
78 and PRNT<sub>50</sub> values were determined using non-linear regression analysis (GraphPad 7.0). And CI  
79 (combination index) values were calculated by CompuSyn software. All of those assays were conducted  
80 in 3 replicates.

81 **ELISA Binding.** The binding of HLX71 to receptor binding domain (RBD) on SARS-CoV-2 S protein  
82 was investigated using an ELISA method. Recombinant SARS-CoV-2 Spike RBD-His was coated onto  
83 a 96-well plate, after incubation with serial diluted HLX71, horseradish peroxidase (HRP)-labelled Goat-  
84 anti-human-IgG-Fc-HRP was added as detection antibody.

85 **ELISA Blocking.** SARS-COV-2 RBD (Spike RBD-mFc) was incubated with various concentrations of  
86 HLX71 (4-fold serial diluted with a start concentration of 100  $\mu\text{g/mL}$ ) for 1 h followed by 0.5 h  
87 incubation with rhACE2-His (50 ng/mL) after washing the unbound hCAE2-Fc in the previous  
88 incubation. The blocking effect was detected by adding His-Tag antibody-HRP.

89 **FACS Blocking.** Cell-based FACS method was used to investigate the inhibitory effect of HLX71 on

90 RBD binding to HEK-293T-hACE2 cells (HEK-293T cells with hACE2 overexpression). Mixed  
91 recombinant SARS-COV-2 RBD (Spike RBD-Fc) with 4-fold serially diluted HLX71 or negative control  
92 were then incubated with HEK-293T-hACE2 cells for 30 min. Phycoerythrin (PE)-labelled goat anti-  
93 human IgG-Fc (PE-anti-human Fc) was used as detection antibody. The labelled cells were analyzed  
94 using FACS.

95 **Pseudovirus neutralization activity.** Wild type or different pseudovirus mutants (Vazyme DD1403-  
96 1439) were used to simulate the process of SARS-CoV-2 infecting host cells. A luciferase reporter  
97 sequence was integrated to genome of the SARS-CoV-2 pseudovirus. When the target cells are infected,  
98 the virus can express luciferase in the cells. By adding luciferase substrate (Vazyme DD1204), the  
99 relative luminescence intensity can be measured, which is correlated positively to the amount of infected  
100 pseudovirus and negatively to the neutralization activity of HLX71. Pseudovirus were pre-incubated  
101 with serial diluted HLX70, HLX71 or HLX70+HLX71 for 1 h at 37 °C. Then  $2 \times 10^4$  293T-hACE2 cells  
102 were added and incubated for 24 h. After adding luciferase substrate, luminescence intensity was  
103 detected for the IC<sub>50</sub> calculation (GraphPad Prism).

104 **HLX71 SARS-CoV-2 virus neutralization.** Three-fold serially diluted HLX71 were added to  
105 approximately 100 PFU of SARS-CoV-2 virus (BetaCoV/Beijing/IMEBJ01/2020 strain or  
106 BetaCoV/Beijing/IMEBJ08/2020 D614G variant strain) solution for 1 h incubation at 37 °C. Then, the  
107 mixture was added to Vero cell monolayers in a 12-well cell culture plates which were incubated in a  
108 37 °C, 5% CO<sub>2</sub> incubator for 1 h. After subsequent incubation, the cells were stained with crystal violet  
109 dissolved in formaldehyde to visualize the plaques. The numbers of plaques in different wells were  
110 counted and the percentage of plaque reduction was calculated as the following formula: Percent of  
111 plaque reduction (%) = (1-plaque number with test drug/plaque number without test drug) × 100%. The  
112 PRNT<sub>90</sub> and PRNT<sub>50</sub> values were determined using non-linear regression analysis (GraphPad 7.0).

113 **Structural analysis.** The structures of the SARS-CoV-2 RBD in complex with CR3022 (PDB: 6W41)  
114 and the Spike protein in complex with S309 (PDB: 6WPS) are aligned and superimposed onto the  
115 structure of the RBD bound with hACE2/ HLX71 (PDB: 7A91). The structure of RBD with HLX70  
116 (PDB: 7CWM) is also aligned for comparison. The classifications are based on the structural analyses  
117 of Barnes et al. HLX71 has a unique binding epitope on RBD distinct from the one bound by HLX70.  
118 Both epitopes are non-overlapping with class 3 (S309) and class 4 (CR3022) Nabs, and therefore could  
119 potentially function in a combinational pair. The structural alignments and figure were prepared using  
120 Pymol (Schrödinger, LLC).  
121
